# Supplementary material
Source: Royal Society of Chemistry journal article supplement (doi:10.1039/d6dt00115g)
Supplement: d6dt00115g1.pdf [file d6dt00115g1.pdf]

## Supporting Information

### **Layered Mixed-Anion Chalcogenides $\text{Pb}_4\text{Sb}_4\text{Q}_9\text{Cl}_2$ (Q = S, Se): Puckered 2D Frameworks, Indirect Band Gaps, and Low Thermal Conductivity**

*Yen-Han Huang<sup>a,1</sup>, Guan-Ruei Chen<sup>b,1</sup>, and Chi-Shen Lee<sup>a,\*</sup>*

*<sup>a</sup>Department of Applied Chemistry, College of Science, National Yang Ming Chiao*

*Tung University, Hsinchu 300093, Taiwan*

*<sup>b</sup>Materials Science Group, National Synchrotron Radiation Research Center, Hsinchu,*

*Taiwan*

*\* Corresponding author. Fax: +886-3-5723764*

<sup>1</sup> Yen-Han Huang and Guan-Ruei Chen contributed equally to this work.

*E-mail address: chishen@nycu.edu.tw*

**Table S1.** Atomic coordinates, site occupancies, and equivalent isotropic displacementparameters for (a)  $\text{Pb}_4\text{Sb}_4\text{S}_9\text{Cl}_2$  and (b)  $\text{Pb}_4\text{Sb}_4\text{Se}_9\text{Cl}_2$ .a)  $\text{Pb}_4\text{Sb}_4\text{S}_9\text{Cl}_2$ 

| Atom | W.P. | x/a        | y/b         | z/c        | U <sub>eq</sub> <sup>a</sup> | Site occ. |           |
|------|------|------------|-------------|------------|------------------------------|-----------|-----------|
| Pb1  | 4h   | 0.87258(5) | 0.06986(4)  | 0.5        | 0.0220(3)                    | Pb        | 1         |
| Pb2  | 4h   | 0.75966(4) | 0.31819(4)  | 0.5        | 0.0193(3)                    | Pb        | 1         |
| Sb1  | 8i   | 0.00491(9) | 0.27249(9)  | 0.0559(10) | 0.0276(12)                   | Sb        | 0.5       |
| Sb2  | 8i   | 0.87681(9) | 0.51828(10) | 0.0584(8)  | 0.0267(10)                   | Sb        | 0.5       |
| S1   | 4g   | 0.7307(2)  | 0.4497(2)   | 0.0        | 0.0140(7)                    | S         | 1         |
| S2   | 4g   | 0.8557(3)  | 0.2078(2)   | 0.0        | 0.0131(7)                    | S         | 1         |
| X1   | 4h   | 0.9299(3)  | 0.3957(3)   | 0.5        | 0.0235(9)                    | S/Cl      | 0.93/0.07 |
| X2   | 4h   | 0.6809(3)  | 0.1218(3)   | 0.5        | 0.0222(8)                    | S/Cl      | 0.87/0.13 |
| X3   | 4h   | 0.5496(3)  | 0.3298(3)   | 0.5        | 0.0275(10)                   | S/Cl      | 0.75/0.25 |
| Cl1  | 2a   | 0.0        | 0.0         | 0.0        | 0.0224(12)                   | Cl        | 1         |

b)  $\text{Pb}_4\text{Sb}_4\text{Se}_9\text{Cl}_2$ 

| Atom | W.P. | x/a        | y/b         | z/c        | U <sub>eq</sub> <sup>a</sup> | Site occ. |           |
|------|------|------------|-------------|------------|------------------------------|-----------|-----------|
| Pb1  | 4h   | 0.75966(4) | 0.31819(4)  | 0.5        | 0.0193(3)                    | Pb        | 1         |
| Pb2  | 4h   | 0.87258(5) | 0.06986(4)  | 0.5        | 0.0220(3)                    | Pb        | 1         |
| Sb1  | 8i   | 0.87681(9) | 0.51828(10) | 0.0584(8)  | 0.0267(10)                   | Sb        | 0.5       |
| Sb2  | 8i   | 0.00491(9) | 0.27249(9)  | 0.0559(10) | 0.0276(12)                   | Sb        | 0.5       |
| Se1  | 4g   | 0.7307(2)  | 0.4497(2)   | 0.0        | 0.0140(7)                    | Se        | 1         |
| Se2  | 4g   | 0.8557(3)  | 0.2078(2)   | 0.0        | 0.0131(7)                    | Se        | 1         |
| X1   | 4h   | 0.9299(3)  | 0.3958(3)   | 0.5        | 0.0235(9)                    | Se/Cl     | 0.93/0.07 |
| X2   | 4h   | 0.5496(3)  | 0.3298(3)   | 0.5        | 0.0272(10)                   | Se/Cl     | 0.87/0.13 |
| X3   | 4h   | 0.6809(3)  | 0.1218(3)   | 0.5        | 0.0225(8)                    | Se/Cl     | 0.75/0.25 |
| Cl1  | 2a   | 0.0        | 0.0         | 0.0        | 0.0224(12)                   | Cl        | 1         |

**Tables S2.** Selected interatomic distances (Å) for  $\text{Pb}_4\text{Sb}_4\text{S}_9\text{Cl}_2$  and  $\text{Pb}_4\text{Sb}_4\text{Se}_9\text{Cl}_2$ .

| $\text{Pb}_4\text{Sb}_4\text{S}_9\text{Cl}_2$ |          |             | $\text{Pb}_4\text{Sb}_4\text{Se}_9\text{Cl}_2$ |          |             |
|-----------------------------------------------|----------|-------------|------------------------------------------------|----------|-------------|
| (x=S)                                         | Contacts | Distance(Å) | (x=Se)                                         | Contacts | Distance(Å) |
| Pb1                                           | S1x2     | 2.918(3)    | Pb1                                            | Se1x2    | 2.9828(18)  |
| Pb1                                           | S2x2     | 3.030(3)    | Pb1                                            | Se2x2    | 3.1245(18)  |
| Pb1                                           | X1       | 2.829(4)    | Pb1                                            | X1       | 2.911(3)    |
| Pb2                                           | Cl1x2    | 3.0003(5)   | Pb2                                            | Cl1x2    | 3.0402(11)  |
| Pb2                                           | S2x2     | 2.969(3)    | Pb2                                            | Se2x2    | 3.0416(18)  |
| Pb2                                           | X2x2     | 3.085(4)    | Pb2                                            | X2x2     | 3.169(3)    |
| Pb2                                           | X3       | 2.992(4)    | Pb2                                            | X3       | 3.088(3)    |
| Sb1                                           | S1       | 2.453(4)    | Sb1                                            | Se1      | 2.607(3)    |
| Sb1                                           | X1       | 2.739(4)    | Sb1                                            | X1x2     | 2.889(9)    |
| Sb1                                           | X3       | 2.920(4)    | Sb1                                            | X3       | 2.971(10)   |
| Sb1                                           | X3x2     | 2.566(4)    | Sb1                                            | X3x2     | 2.690(10)   |
| Sb2                                           | S2       | 2.468(4)    | Sb2                                            | Se2      | 2.609(3)    |
| Sb2                                           | X1       | 2.866(5)    | Sb2                                            | X1       | 3.042(10)   |
| Sb2                                           | X2x2     | 2.501(4)    | Sb2                                            | X2x2     | 2.896(13)   |
| Sb2                                           | X2x2     | 2.848(4)    | Sb2                                            | X2x2     | 2.636(12)   |

**Table S3.** Details of Rietveld refinements for  $\text{Pb}_4\text{Sb}_4\text{S}_9\text{Cl}_2$  and  $\text{Pb}_4\text{Sb}_4\text{Se}_9\text{Cl}_2$ .

| Chemical formula                                | $\text{Pb}_4\text{Sb}_4\text{S}_9\text{Cl}_2$ | $\text{Pb}_4\text{Sb}_4\text{Se}_9\text{Cl}_2$ |
|-------------------------------------------------|-----------------------------------------------|------------------------------------------------|
| Formula weight                                  | 1674.2                                        | 2097.30                                        |
| Temperature, K                                  | 296(2)                                        |                                                |
| Wavelength, Å                                   | 0.6199                                        |                                                |
| Crystal system                                  | Orthorhombic                                  |                                                |
| Space group, Z                                  | <i>Pbam</i> (No 55), 2                        |                                                |
| <i>a</i> (Å)                                    | 15.031(1)                                     | 15.4645(8)                                     |
| <i>b</i> (Å)                                    | 15.525(1)                                     | 16.0721(1)                                     |
| <i>c</i> (Å)                                    | 4.0872(3)                                     | 4.18268(3)                                     |
| Volume, Å <sup>3</sup>                          | 953.78(1)                                     | 1039.60(1)                                     |
| Density (calculated), g/cm <sup>3</sup>         | 5.8323 (8)                                    | 6.71404(7)                                     |
| 2 $\theta$ Range                                | 2-35                                          |                                                |
| Linear Absorption coefficient, cm <sup>-1</sup> | 296.321(4)                                    | 376.196(4)                                     |
| $R_p$                                           | 2.90                                          | 2.28                                           |
| $R_{wp}$                                        | 4.85                                          | 3.47                                           |
| $R_{exp}$                                       | 1.01                                          | 1.05                                           |
| <i>GOF</i>                                      | 4.80                                          | 3.30                                           |

**Table S4.** SEM-EDS elemental analysis of  $\text{Pb}_4\text{Sb}_4\text{Q}_9\text{Cl}_2$  ( $\text{X} = \text{S}, \text{Se}$ ) from SEM-EDS

| $\text{Pb}_4\text{Sb}_4\text{S}_9\text{Cl}_2$ |           |            | $\text{Pb}_4\text{Sb}_4\text{Se}_9\text{Cl}_2$ |           |            |
|-----------------------------------------------|-----------|------------|------------------------------------------------|-----------|------------|
|                                               | EXP. Mol% | Ideal Mol% |                                                | EXP. Mol% | Ideal Mol% |
| Pb                                            | 19.03     | 21.05      | Pb                                             | 20.52     | 21.05      |
| Sb                                            | 21.44     | 21.05      | Sb                                             | 20.78     | 21.05      |
| S                                             | 48.75     | 47.37      | Se                                             | 49.29     | 47.37      |
| Cl                                            | 10.78     | 10.53      | Cl                                             | 9.40      | 10.53      |

**Table S5.** Binding energies (in eV) of constituent element core levels in  $\text{Pb}_4\text{Sb}_4\text{S}_9\text{Cl}_2$  and  $\text{Pb}_4\text{Sb}_4\text{Se}_9\text{Cl}_2$ .

|                   | $\text{Pb}_4\text{Sb}_4\text{S}_9\text{Cl}_2$ | $\text{Pb}_4\text{Sb}_4\text{Se}_9\text{Cl}_2$ |
|-------------------|-----------------------------------------------|------------------------------------------------|
| Pb                |                                               |                                                |
| 4f <sub>7/2</sub> | 138.2                                         | 138.0                                          |
| 4f <sub>5/2</sub> | 143.0                                         | 142.8                                          |
| Sb                |                                               |                                                |
| 3d <sub>5/2</sub> | 529.6                                         | 529.6                                          |
| 3d <sub>3/2</sub> | 538.8                                         | 538.8                                          |
| S                 |                                               |                                                |
| 2p <sub>3/2</sub> | 161.4                                         |                                                |
| 2p <sub>1/2</sub> | 162.5                                         |                                                |
| Se                |                                               |                                                |
| 3d <sub>5/2</sub> |                                               | 53.7                                           |
| 3d <sub>3/2</sub> |                                               | 54.4                                           |
| Cl                |                                               |                                                |
| 2p <sub>3/2</sub> | 197.8                                         | 197.8                                          |
| 2p <sub>1/2</sub> | 199.3                                         | 199.3                                          |

**Table S6.** Bond-valence sums (BVS) for  $\text{Pb}_4\text{Sb}_4\text{S}_9\text{Cl}_2$  and  $\text{Pb}_4\text{Sb}_4\text{Se}_9\text{Cl}_2$ .

| Site   | Elements | Occupancy | $\text{Pb}_4\text{Sb}_4\text{S}_9\text{Cl}_2$ | $\text{Pb}_4\text{Sb}_4\text{Se}_9\text{Cl}_2$ |
|--------|----------|-----------|-----------------------------------------------|------------------------------------------------|
| Pb1    | Pb       | 1         | 2.24                                          | 2.44                                           |
| Pb2    | Pb       | 1         | 2.17                                          | 2.24                                           |
| Sb1    | Sb       | 1         | 2.46                                          | 2.57                                           |
| Sb2    | Sb       | 1         | 2.52                                          | 2.65                                           |
| S1/Se1 | S/Se     | 1         | 2.08                                          | 2.29                                           |
| S2/Se2 | S/Se     | 1         | 2.12                                          | 2.38                                           |
| X1a    | S/Se     | 0.93      | 1.70                                          | 1.63                                           |
| X1b    | Cl       | 0.07      | 1.22                                          | 0.91                                           |
| X2a    | S/Se     | 0.87      | 1.48                                          | 1.84                                           |
| X2b    | Cl       | 0.13      | 1.13                                          | 1.01                                           |
| X3a    | S/Se     | 0.75      | 1.63                                          | 1.58                                           |
| X3b    | Cl       | 0.25      | 1.26                                          | 0.87                                           |
| Cl1    | Cl       | 1         | 1.12                                          | 1.01                                           |

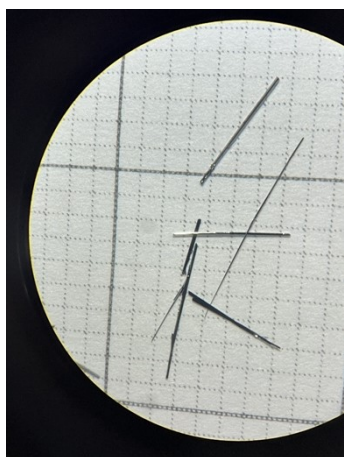

a)  $\text{Pb}_4\text{Sb}_4\text{S}_9\text{Cl}_2$

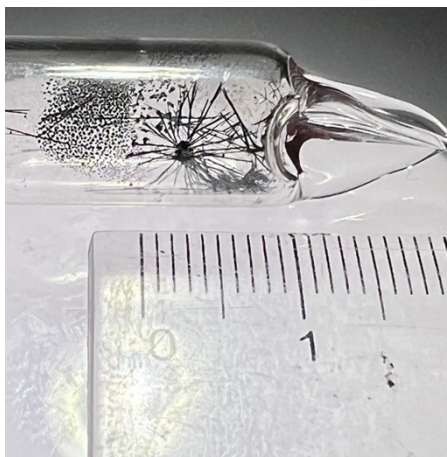

b)  $\text{Pb}_4\text{Sb}_4\text{Se}_9\text{Cl}_2$

**Figure S1.** Optical photographs of  $\text{Pb}_4\text{Sb}_4\text{S}_9\text{Cl}_2$  and  $\text{Pb}_4\text{Sb}_4\text{Se}_9\text{Cl}_2$  crystals.

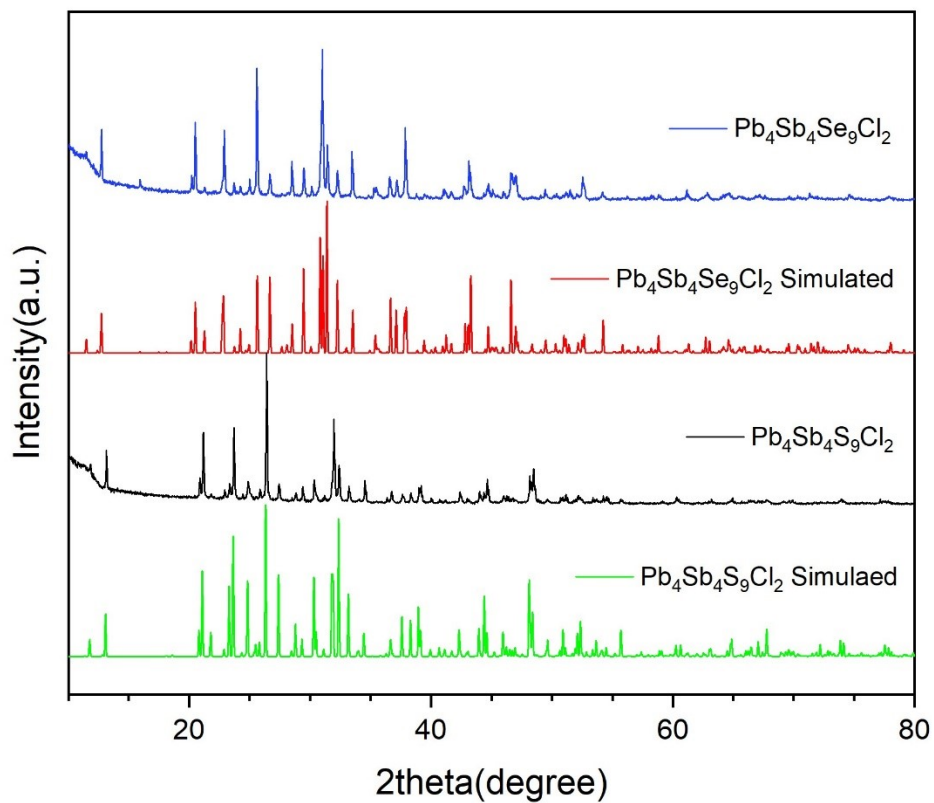

**Figure S2.** Experimental and simulated powder X-ray diffraction patterns of  $\text{Pb}_4\text{Sb}_4\text{S}_9\text{Cl}_2$  and  $\text{Pb}_4\text{Sb}_4\text{Se}_9\text{Cl}_2$ .

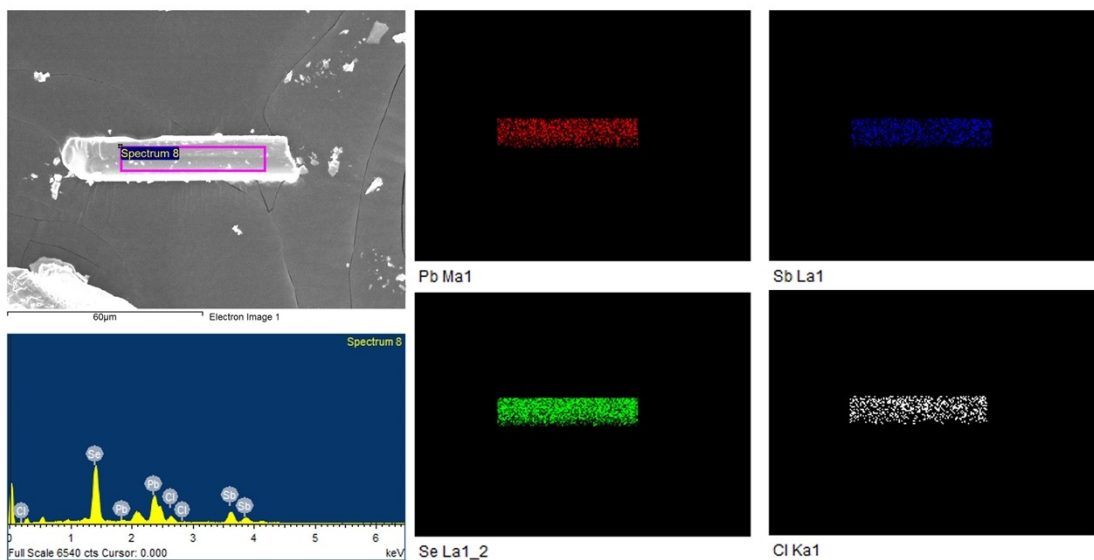

a)  $\text{Pb}_4\text{Sb}_4\text{S}_9\text{Cl}_2$

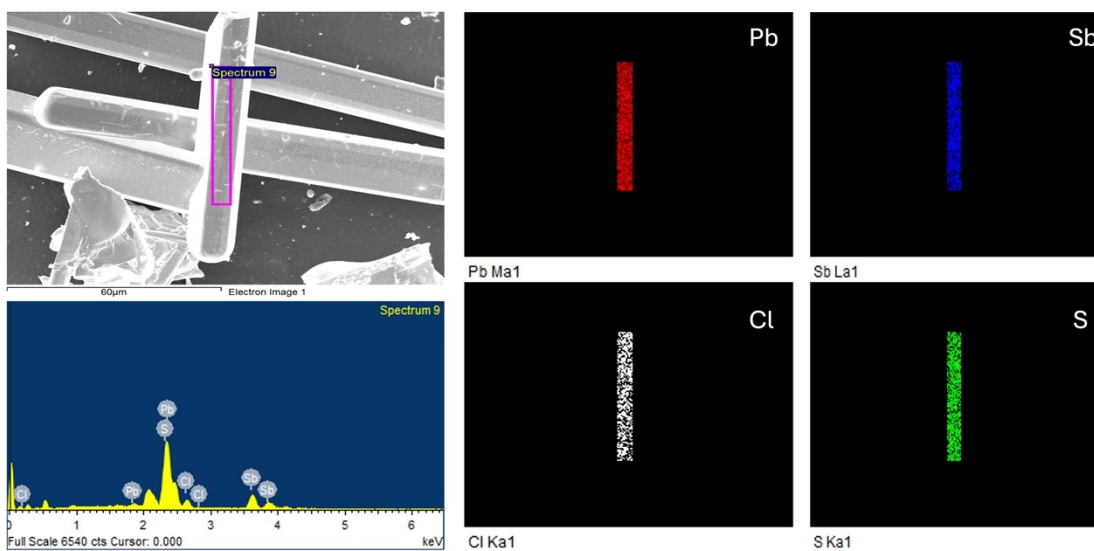

b)  $\text{Pb}_4\text{Sb}_4\text{Se}_9\text{Cl}_2$

**Figure S3.** SEM images and EDS elemental maps of a)  $\text{Pb}_4\text{Sb}_4\text{S}_9\text{Cl}_2$  and b)  $\text{Pb}_4\text{Sb}_4\text{Se}_9\text{Cl}_2$ .

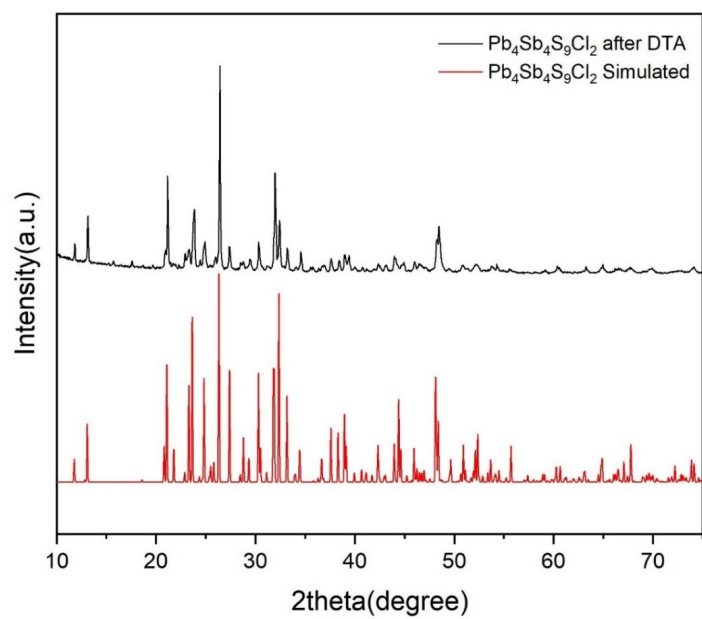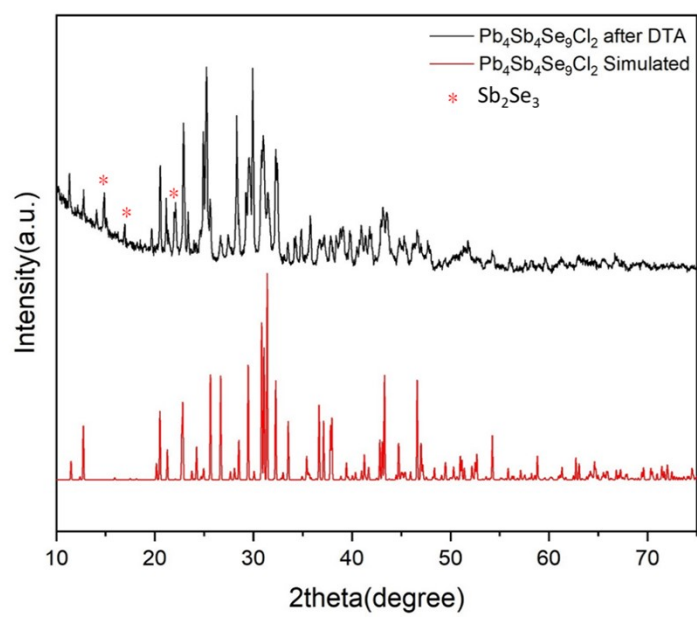

**Figure S4.** Powder X-ray diffraction patterns of a)  $\text{Pb}_4\text{Sb}_4\text{S}_9\text{Cl}_2$ , b)  $\text{Pb}_4\text{Sb}_4\text{Se}_9\text{Cl}_2$  before and after DTA measurements.

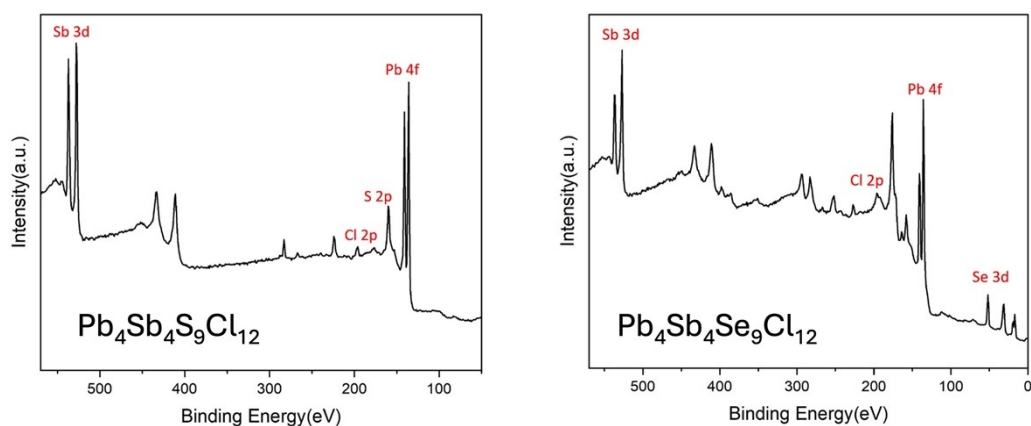

a) Broad scan of  $\text{Pb}_4\text{Sb}_4\text{S}_9\text{Cl}_2$  and  $\text{Pb}_4\text{Sb}_4\text{Se}_9\text{Cl}_2$

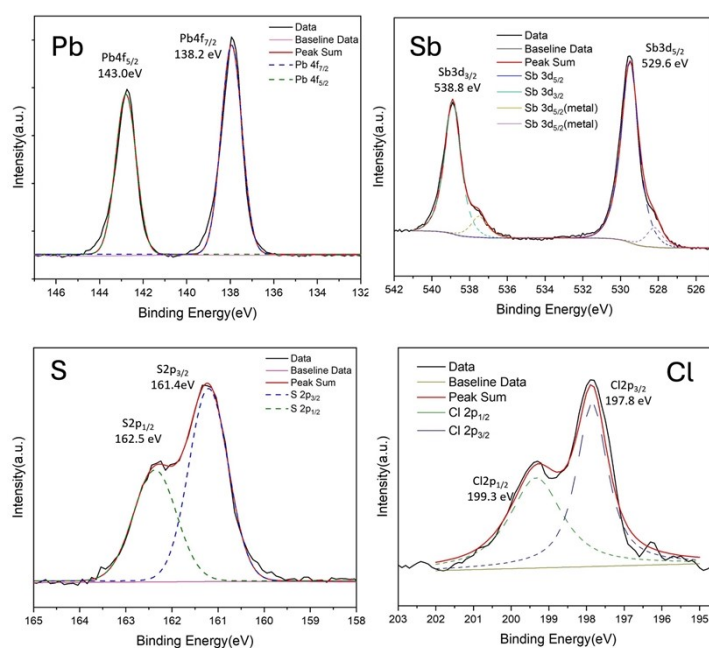

b) High resolution spectra for  $\text{Pb}_4\text{Sb}_4\text{S}_9\text{Cl}_2$

**Figure S5.** XPS data for  $\text{Pb}_4\text{Sb}_4\text{S}_9\text{Cl}_2$  and  $\text{Pb}_4\text{Sb}_4\text{Se}_9\text{Cl}_2$ : (a) survey spectra; (b) high-resolution spectra of  $\text{Pb}_4\text{Sb}_4\text{S}_9\text{Cl}_2$ . Note: XPS measurements on  $\text{Pb}_4\text{Sb}_4\text{S}_9\text{Cl}_2$  confirm a chemical environment closely analogous to that of  $\text{Pb}_4\text{Sb}_4\text{Se}_9\text{Cl}_2$ . High-resolution spectra exhibit Pb 4f peaks at 138.4 eV ( $4f_{7/2}$ ) and 143.3 eV ( $4f_{5/2}$ ) characteristic of  $\text{Pb}^{2+}$ , and Sb 3d peaks at 529.6 eV ( $3d_{5/2}$ ) and 539.0 eV ( $3d_{3/2}$ ) consistent with  $\text{Sb}^{3+}$ .<sup>1, 2</sup> The S 2p doublet appears at 162.3 eV ( $2p_{3/2}$ ) and 163.5 eV ( $2p_{1/2}$ ), confirming the presence of sulfide anions ( $\text{S}^{2-}$ ).<sup>3, 4</sup> Chlorine 2p features at 198.0 eV ( $2p_{3/2}$ ) and 200.0 eV ( $2p_{1/2}$ ) correspond to chloride ions ( $\text{Cl}^-$ ).<sup>5</sup> The close similarity in the spectral profiles of the S- and Se-based analogues confirms that substitution of Se for S does not alter the fundamental chemical environments within the lattice.

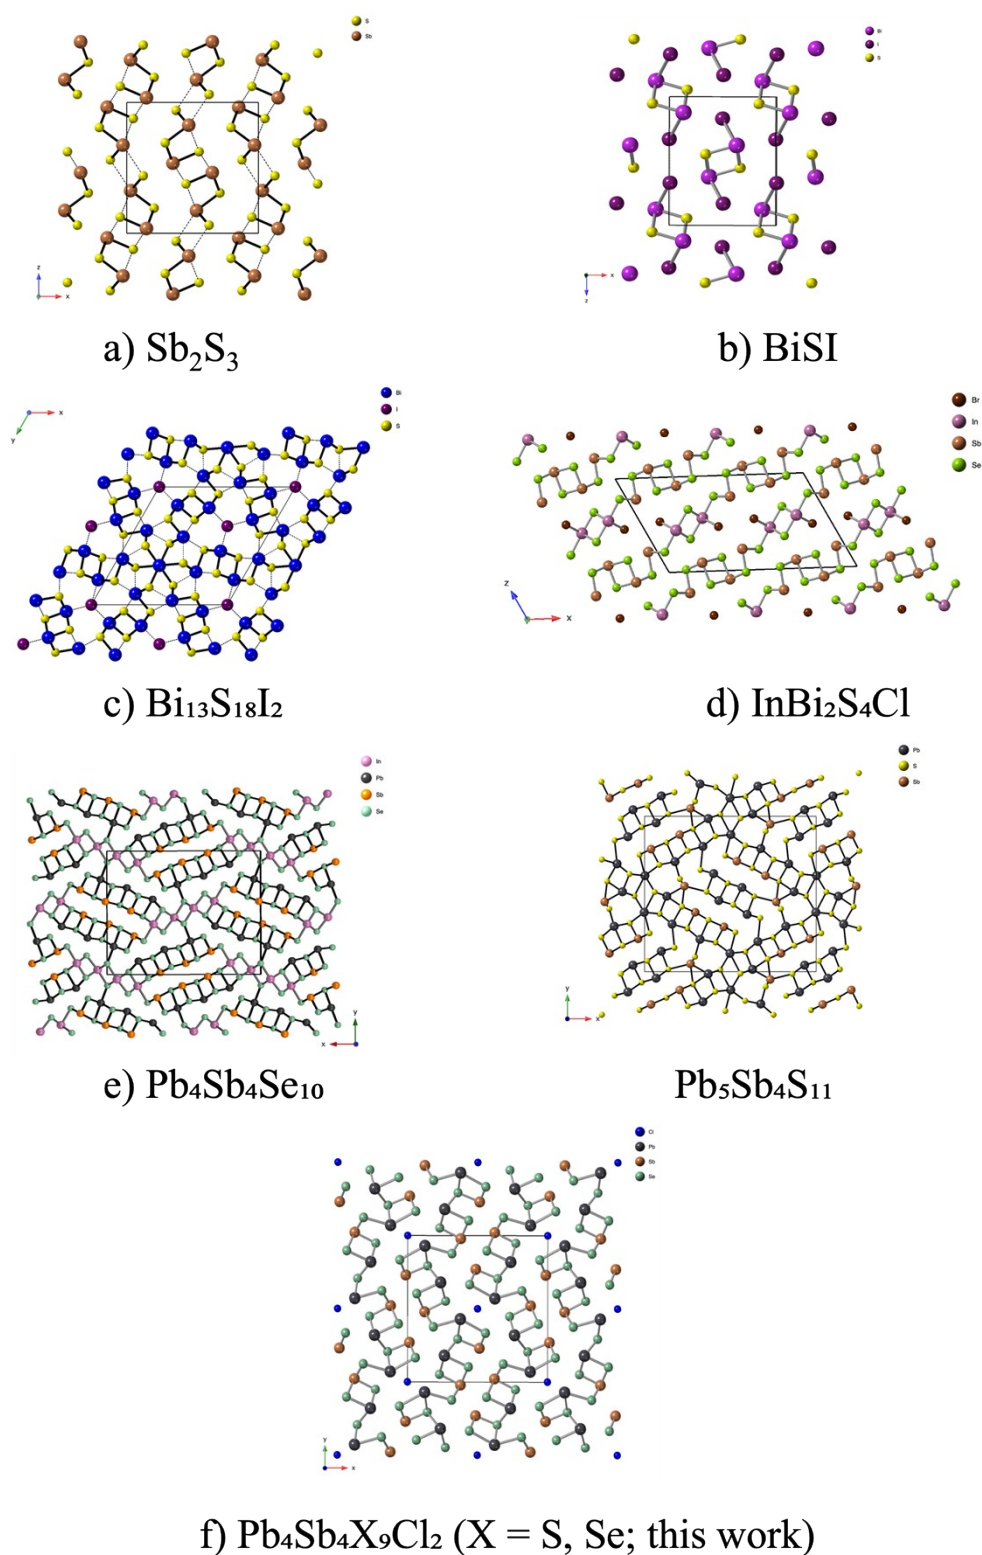

**Figure S6.** Comparison of representative ribbon- and layer-related motifs in selected chalcogenide and chalcogenide structures: (a)  $\text{Bi}_2\text{S}_3$ <sup>6</sup>, (b)  $\text{BiSI}$ <sup>7</sup>, (c)  $\text{Bi}_{13}\text{S}_{18}\text{I}_2$ <sup>8,9</sup>, (d)  $\text{InBi}_2\text{S}_4\text{Cl}$ <sup>10</sup>, (e)  $\text{Pb}_4\text{Sb}_4\text{Se}_{10}$ <sup>11</sup> and  $\text{Pb}_5\text{Sb}_4\text{S}_{11}$ <sup>12</sup>, (f)  $\text{Pb}_4\text{Sb}_4\text{Q}_9\text{Cl}_2$  (X = S, Se; this work).

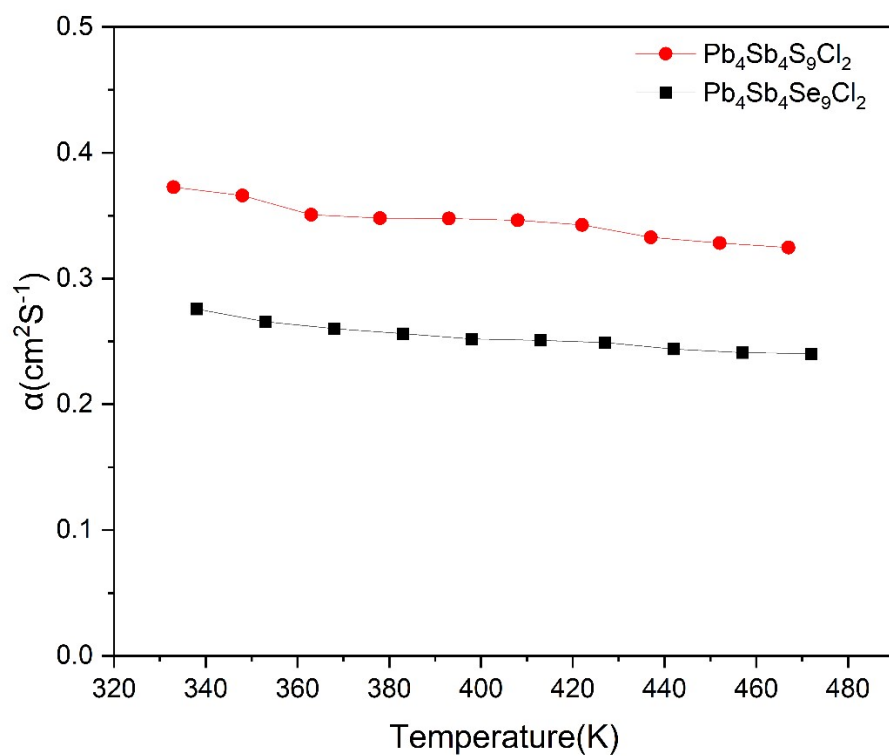

**Figure S7.** Temperature-dependent thermal diffusivity of  $\text{Pb}_4\text{Sb}_4\text{S}_9\text{Cl}_2$  (black) and  $\text{Pb}_4\text{Sb}_4\text{Se}_9\text{Cl}_2$  (Red).

## References

1. J. Wang and F. Guan, *CrystEngComm*, 2020, **22**, 68–73.
2. D. A. Zatsepin, D. W. Boukhvalov, N. V. Gavrilov, A. F. Zatsepin, V. Y. Shur, A. A. Esin, S. S. Kim and E. Z. Kurmaev, *Appl. Surf. Sci.*, 2017, **400**, 110–117.
3. S. Zhang, H. Yang, H. Gao, R. Cao, J. Huang and X. Xu, *ACS Appl. Mater. Interfaces*, 2017, **9**, 23635–23646.
4. Z. Wu, Y. Jiang, X. Xiong, S. Ding, Y. Shi, X. Liu, Y. Liu, Z. Huang and J. Hu, *Catal. Sci. Technol.*, 2017, **7**, 3464–3468.
5. L. Ding, R. Wei, H. Chen, J. Hu and J. Li, *Appl. Catal., B*, 2015, **172-173**, 91–99.
6. L. F. Lundegaard, E. Makovicky, T. Boffa-Ballaran and T. Balic-Zunic, *Phys. Chem. Miner.*, 2005, **32**, 578–584.
7. S. Li, L. Xu, X. Kong, T. Kusunose, N. Tsurumachi and Q. Feng, *J. Mater. Chem. C*, 2020, **8**, 3821–3829.
8. R. Groom, A. Jacobs, M. Cepeda, R. Drummey and S. E. Latturner, *Chem. Mater.*, 2017, **29**, 3314–3323.
9. A. Das, K. Debnath, I. Maria, S. Das, P. Dutta, D. Swain, U. V. Waghmare and K. Biswas, *J. Am. Chem. Soc.*, 2024, **146**, 30518–30528.
10. V. Krämer, *Mater. Res. Bull.*, 1976, **11**, 183–187.
11. A. Skowron and I. D. Brown, *Acta Crystallogr. C.*, 1990, **46**, 2287–2291.
12. A. Skowron and I. D. Brown, *Acta Crystallogr. Sect. C*, 1990, **46**, 531–534.
